# Supplementary material for: A randomized trial comparing perinatal outcomes using insulin detemir or neutral protamine Hagedorn in type 1 diabetes
Source: PubMed Central journal article supplement — J Matern Fetal Neonatal Med. 2013 Jun 4;27(1):7–13. doi: 10.3109/14767058.2013.799650 (PMC3862070; doi:10.3109/14767058.2013.799650), 2013-06-04
Supplement: JMF-27-7-s1111.pdf [file JMF-27-7-s1111.pdf]

**Supplementary Figure 1. Subject disposition.**

\*Two subjects stayed in the trial following spontaneous abortions.

AE, adverse event.

Reprinted and adapted with permission from Mathiesen et al. Diabetes Care

2012;35:2012-2017 [16], copyright American Diabetes Association 2012.

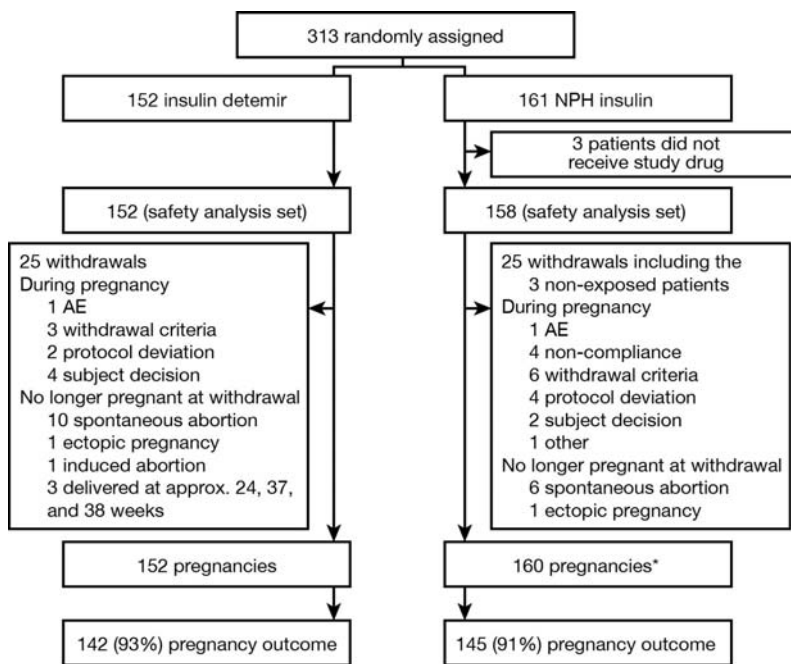

**Supplementary Table I.** Clinical characteristics at baseline prior to start of study drug.

| <b>Characteristic</b>                           | <b>IDet</b>  | <b>NPH</b>   |
|-------------------------------------------------|--------------|--------------|
| Randomized and exposed                          | 152          | 158          |
| Randomized during early pregnancy, <i>n</i> (%) | 79 (52.0)    | 83 (52.5)    |
| Randomized before pregnancy, <i>n</i> (%)       | 73 (48.0)    | 75 (47.5)    |
| Age, years                                      | 29.7 (4.6)   | 30.4 (4.2)   |
| BMI, kg/m <sup>2</sup>                          | 24.3 (4.0)   | 25.2 (4.2)   |
| Duration of diabetes, years                     | 11.7 (8.1)   | 12.8 (7.9)   |
| A1C, %                                          | 6.95 (0.82)  | 7.08 (0.76)  |
| FPG, mg/dL                                      | 106.0 (59.2) | 107.8 (58.1) |
| FPG, mmol/L                                     | 5.9 (3.3)    | 6.0 (3.2)    |
| Retinopathy, <i>n</i> (%)                       | 43 (28.3)    | 40 (25.3)    |
| Smoker, <i>n</i> (%)                            | 9 (5.9)      | 11 (7.0)     |

Values are mean (SD) or numbers (%).

A1C, glycated hemoglobin; FPG, fasting plasma glucose; IDet, insulin detemir; NPH, neutral protamine Hagedorn.

**Supplementary Table II.** Mode of delivery.

| Characteristic                                           | IDet     |       | NPH      |      |
|----------------------------------------------------------|----------|-------|----------|------|
|                                                          | <i>n</i> | %     | <i>n</i> | %    |
| Pregnancy outcomes at follow-up                          | 142      | –     | 145      | –    |
| Live births                                              | 128      | –     | 136      | –    |
| Mode of delivery                                         | 130      | 100%* | 136      | 100% |
| Spontaneous onset of labor                               | 25       | 19%   | 38       | 28%  |
| Induction of labor                                       | 50       | 38%   | 49       | 36%  |
| Vaginal delivery                                         | 54       | 42%   | 50       | 37%  |
| <i>Instrumental (calculated from vaginal deliveries)</i> | 13       | 24%   | 10       | 20%  |
| Elective caesarean section                               | 49       | 38%   | 49       | 36%  |
| Emergency caesarean section                              | 27       | 21%   | 37       | 27%  |

Values are numbers (%).

\* 2 stillbirths are included in the IDet group.

IDet, insulin detemir; NPH, neutral protamine Hagedorn.

**Supplementary Table III.** Summary of adverse, serious, and severe adverse events in the offspring.

|                                                     |                              | IDet     |      |                    | NPH      |      |                    |
|-----------------------------------------------------|------------------------------|----------|------|--------------------|----------|------|--------------------|
|                                                     |                              | <i>n</i> | %    | Episodes/<br>child | <i>n</i> | %    | Episodes/<br>child |
| All AEs                                             | All                          | 56       | 36.8 | 2.2                | 55       | 34.8 | 2.8                |
|                                                     | Pregnant at randomization    | 33       | 41.8 | 1.8                | 29       | 34.9 | 2.6                |
|                                                     | Pregnant after randomization | 23       | 31.5 | 2.6                | 26       | 34.7 | 3.0                |
| Serious AEs                                         | All                          | 36       | 23.7 | 1.4                | 32       | 20.3 | 1.7                |
|                                                     | Pregnant at randomization    | 20       | 25.3 | 1.4                | 17       | 20.5 | 1.9                |
|                                                     | Pregnant after randomization | 16       | 21.9 | 1.4                | 15       | 20.0 | 1.3                |
| Severe AEs                                          | All                          | 15       | 9.9  | 1.1                | 12       | 7.6  | 1.8                |
|                                                     | Pregnant at randomization    | 5        | 6.3  | 1.0                | 7        | 8.4  | 1.0                |
|                                                     | Pregnant after randomization | 10       | 13.7 | 1.2                | 5        | 6.7  | 1.6                |
| AEs possibly/probably related to basal insulin*     | All                          | 1        | 0.7  | 1.0                | 0        | 0.0  | 0.0                |
|                                                     | Pregnant at randomization    | 1        | 1.3  | 1.0                | 0        | 0.0  | 0.0                |
|                                                     | Pregnant after randomization | 0        | 0.0  | 0.0                | 0        | 0.0  | 0.0                |
| AEs possibly/probably related to bolus insulin* All |                              | 1        | 0.7  | 1.0                | 0        | 0.0  | 0.0                |

|                           |                              |   |     |     |   |     |     |
|---------------------------|------------------------------|---|-----|-----|---|-----|-----|
|                           | Pregnant at randomization    | 1 | 1.3 | 1.0 | 0 | 0.0 | 0.0 |
|                           | Pregnant after randomization | 0 | 0.0 | 0.0 | 0 | 0.0 | 0.0 |
| <hr/>                     |                              |   |     |     |   |     |     |
|                           | All                          | 0 | 0.0 | 0.0 | 1 | 0.6 | 1.0 |
| AEs leading to withdrawal | Pregnant at randomization    | 0 | 0.0 | 0.0 | 0 | 0.0 | 0.0 |
|                           | Pregnant after randomization | 0 | 0.0 | 0.0 | 1 | 1.3 | 1.0 |

\* This case of fetal distress was detected by an antenatal non-stress test (cardiotocography) performed due to maternal pruritus and elevated liver enzymes (hepatic cytolysis) at GW 36+2 days. The child was born healthy by caesarean section, with an Apgar score of 10 at 1 minute after birth, and was considered recovered on the same day. The mother temporarily discontinued use of insulin detemir for 1 day after which the insulin was reintroduced. Mother and child were discharged from the hospital 1 week after delivery. At the follow-up examination the mother was considered fully recovered. The event was considered by the investigator to be possibly or probably related to both the basal and bolus insulins, but an alternative aetiology of the mother's liver dysfunction was also provided. A full evaluation by the safety surveillance department of the sponsor, however, concluded the event to be unrelated to the basal and bolus insulins.

AE, adverse event; IDet, insulin detemir; NPH, neutral protamine Hagedorn.

**Supplementary Table IV.** Common adverse events (occurring in  $\geq 4$  offspring in any treatment group) by system organ class vigilance.

|                                                 | IDet     |      |                    | NPH      |      |                    |
|-------------------------------------------------|----------|------|--------------------|----------|------|--------------------|
|                                                 | <i>n</i> | %    | Episodes/<br>child | <i>n</i> | %    | Episodes<br>/child |
| Events                                          | 56       | 36.8 | 2.2                | 55       | 34.8 | 2.7                |
| Pregnancy, puerperium, and perinatal conditions | 26       | 17.1 | 1.3                | 27       | 17.1 | 1.3                |
| Respiratory, thoracic and mediastinal disorders | 13       | 8.6  | 1.1                | 11       | 7.0  | 1.4                |
| Nervous system disorders                        | 5        | 3.3  | 1.0                | 9        | 5.7  | 1.8                |
| Investigations                                  | 3        | 2.0  | 1.0                | 7        | 4.4  | 1.0                |
| Hepatobiliary disorders                         | 5        | 3.3  | 1.0                | 3        | 1.9  | 1.0                |

IDet, insulin detemir; NPH, neutral protamine Hagedorn.

## **Supplement S5. Detail of trial sites.**

4 trial sites in Buenos Aires, Argentina; Cordoba, Argentina; 3 trial sites in Vienna, Austria; Broadmeadow, New South Wales, Australia; Elizabeth Vale, South Australia, Australia; St Leonards, New South Wales, Australia; Camperdown, New South Wales, Australia; Garran, Australian Capital Territory, Australia; Sao Paulo, São Paulo, Brazil; Porto Alegre, Rio Grande do Sul, Brazil; Curitiba, Paraná, Brazil; 2 trial sites in Toronto, Ontario, Canada; London, Ontario, Canada; Montreal, Quebec, Canada; Calgary, Alberta, Canada; Edmonton, Alberta, Canada; Vancouver, British Columbia, Canada; Québec, Quebec, Canada; Winnipeg, Manitoba, Canada; Cambridge, Ontario, Canada; Copenhagen, Denmark; Aarhus, Denmark; Aalborg, Denmark; Alicante, Spain; Santander, Spain; Sevilla, Spain; Barcelona, Spain; Madrid, Spain; Helsinki, Finland; Lille, Nord-Pas-de-Calais, France; Angers, Pays de la Loire, France; Nimes, Languedoc-Roussillon, France; Toulouse, Midi-Pyrénées, France; Bondy, Île-de-France, France; Montpellier, Languedoc-Roussillon, France; Strasbourg, Alsace, France; Valenciennes, Nord-Pas-de-Calais, France; Zagreb, Croatia; 2 trial sites in Dublin, Republic of Ireland; Petah Tikva, Israel; Bergen, Norway; Trondheim, Norway; Tønsberg, Norway; Lodz, Poland; Zabrze, Poland; Krakow, Poland; Lublin, Poland; Olsztyn, Poland; Wroclaw, Poland; Szczecin, Poland; 2 trial sites in Warszawa, Poland; 3 trial sites in Moscow, Russia; Saint Petersburg, Russia; Novosibirsk, Russia; Tumen, Russia; Durban, South Africa; Bristol, UK; Middlesbrough, UK; Northampton, UK; Blackburn, UK; Southampton, UK; Waford, UK; Belfast, UK; Exeter, UK; Plymouth, UK; Leicester, UK; London, UK; Birmingham, UK; Norwich, UK.
